# Supplementary material for: Text Matching and Categorization: Mining Implicit Semantic Knowledge from Tree-Shape Structures
Source: Hindawi journal article supplement (doi:10.1155/2015/723469), 2015-01-01
Supplement: f1 [file 723469.f1.doc]

Node in SemGraph of car-class (Table 3)：

| **NUM** | **Noun** | **Weight** | **NUM** | **Noun** | **Weight** | **NUM** | **Noun** | **Weight** |
| --- | --- | --- | --- | --- | --- | --- | --- | --- |
| **1** | model | 13.66 | **58** | appearance | 0.5 | **115** | manager | 0.24 |
| **2** | automobile | 10.77 | **59** | dashboard | 0.5 | **116** | cash | 0.23 |
| **3** | market | 3.61 | **60** | Mazda | 0.5 | **117** | Carnival | 0.23 |
| **4** | system | 3.07 | **61** | Core technology | 0.5 | **118** | employee | 0.22 |
| **5** | engine | 2.93 | **62** | property right | 0.5 | **119** | sales volume | 0.21 |
| **6** | Volkswagen | 2.52 | **63** | Tax | 0.5 | **120** | limited company | 0.2 |
| **7** | besturn | 2.3 | **64** | generation | 0.46 | **121** | base | 0.2 |
| **8** | China | 2.25 | **65** | senior leader | 0.46 | **122** | quarter | 0.19 |
| **9** | FAW | 2.17 | **66** | Honda | 0.45 | **123** | chairman | 0.19 |
| **10** | power | 2.16 | **67** | profile | 0.43 | **124** | truck | 0.18 |
| **11** | platform | 1.5 | **68** | domain | 0.42 | **125** | bank | 0.17 |
| **12** | Audis | 1.5 | **69** | Changan | 0.42 | **126** | malfunction | 0.16 |
| **13** | lamp | 1.49 | **70** | torque | 0.42 | **127** | outline | 0.16 |
| **14** | hybrids | 1.45 | **71** | Peugeot | 0.41 | **128** | GM | 0.16 |
| **15** | BMW | 1.43 | **72** | tire | 0.4 | **129** | motor | 0.16 |
| **16** | underpan | 1.34 | **73** | electric vehicle | 0.4 | **130** | road | 0.15 |
| **17** | consumer | 1.19 | **74** | peak value | 0.39 | **131** | filter element | 0.15 |
| **18** | vehicle | 1.18 | **75** | Dynamic | 0.37 | **132** | motor master | 0.15 |
| **19** | Car | 1.16 | **76** | Fashion | 0.37 | **133** | department | 0.15 |
| **20** | Santana | 1.14 | **77** | air quality | 0.36 | **134** | electron | 0.15 |
| **21** | bloc | 1.13 | **78** | Suzuki | 0.36 | **135** | enterprise | 0.15 |
| **22** | brand | 1.1 | **79** | Jangling | 0.35 | **136** | key | 0.14 |
| **23** | Jaguar | 1.02 | **80** | Shanghai | 0.34 | **137** | flagship | 0.14 |
| **24** | Luxgen | 1 | **81** | sport car | 0.33 | **138** | Fiat | 0.14 |
| **25** | Ford | 0.99 | **82** | Porsche | 0.33 | **139** | finance | 0.13 |
| **26** | technology | 0.92 | **83** | electrical control | 0.33 | **140** | battery | 0.13 |
| **27** | Dongfeng | 0.9 | **84** | technique | 0.33 | **141** | retained profits | 0.13 |
| **28** | turbine | 0.9 | **85** | leather | 0.33 | **142** | concept | 0.12 |
| **29** | intelligence | 0.82 | **86** | set | 0.33 | **143** | Guangfeng | 0.12 |
| **30** | Benz | 0.77 | **87** | capacity factor | 0.33 | **144** | mainland | 0.11 |
| **31** | performance | 0.76 | **88** | dynamical system | 0.33 | **145** | German | 0.11 |
| **32** | Citroen | 0.75 | **89** | product | 0.33 | **146** | North America | 0.11 |
| **33** | Chery | 0.75 | **90** | handbook | 0.33 | **147** | Information | 0.11 |
| **34** | gasoline | 0.69 | **91** | manufacturer | 0.33 | **148** | natural gas | 0.11 |
| **35** | science | 0.69 | **92** | cost | 0.33 | **149** | city | 0.11 |
| **36** | line | 0.68 | **93** | high-end | 0.33 | **150** | capacity | 0.11 |
| **37** | versions | 0.67 | **94** | Beijing | 0.32 | **151** | exhibition hall | 0.11 |
| **38** | price | 0.67 | **95** | quality | 0.31 | **152** | connecting rod | 0.1 |
| **39** | function | 0.66 | **96** | Chevy | 0.3 | **153** | adjustment | 0.1 |
| **40** | manipulate | 0.66 | **97** | BAW | 0.3 | **154** | hydraulic pressure | 0.1 |
| **41** | place | 0.65 | **98** | internet | 0.29 | **155** | gearbox | 0.09 |
| **42** | business | 0.65 | **99** | pull rod | 0.28 | **156** | petroleum | 0.08 |
| **43** | Toyota | 0.65 | **100** | driver | 0.28 | **157** | region | 0.08 |
| **44** | motive power | 0.62 | **101** | euro | 0.27 | **158** | ownership | 0.08 |
| **45** | car body | 0.6 | **102** | size | 0.26 | **159** | lens | 0.08 |
| **46** | weight | 0.58 | **103** | manipulate | 0.25 | **160** | project | 0.08 |
| **47** | Chrysler | 0.57 | **104** | tactility | 0.25 | **161** | architecture | 0.07 |
| **48** | company | 0.55 | **105** | manipulate | 0.25 | **162** | requirement | 0.07 |
| **49** | Hongqi | 0.55 | **106** | wheel hub | 0.25 | **163** | mill | 0.06 |
| **50** | space | 0.55 | **107** | function | 0.25 | **164** | industry | 0.05 |
| **51** | engine oil | 0.53 | **108** | shape | 0.25 | **165** | wellhead | 0.05 |
| **52** | aspect | 0.52 | **109** | brake | 0.25 | **166** | word of mouth | 0.04 |
| **53** | overseas edition | 0.5 | **110** | Changfeng | 0.25 | **167** | global | 0.03 |
| **54** | seat | 0.5 | **111** | red | 0.25 | **168** | finance | 0.03 |
| **55** | style | 0.5 | **112** | honeycomb | 0.25 | **169** | tendency | 0.02 |
| **56** | detail | 0.5 | **113** | bumper | 0.25 |  |  |  |
| **57** | airbag | 0.5 | **114** | Asian | 0.24 |  |  |  |
